# Supplementary material for: Mathematical modeling of the Candida albicans yeast to hyphal transition reveals novel control strategies
Source: PLoS Comput Biol. 2021 Mar 29;17(3):e1008690. doi: 10.1371/journal.pcbi.1008690 (PMC8031856; doi:10.1371/journal.pcbi.1008690)
Supplement: S3 File — All attractors of the YHT network following single-node knockout or constitutive activation of each node in the core network. (XLSX) [file pcbi.1008690.s007.xlsx]

## Sheet: Brg1=0
Brg1	Cyr1	EFG1_T	ESCRT	Efg1	Efg1_active	Farnesol	HAG_T	HATs	HDACs	NRG1_T	Nrg1_HAGs	Rim8	Temperature	Ume6	cAMP_PKA	hyphal_initiation	hyphal_maintenance	pH	type
0	0	1	0	1	0	0	0	0	0	1	1	0	0	0	0	0	0	0	y
0	0	X	1	X	X	0	0	X	0	X	X	1	0	0	0	0	0	1	y
0	1	X	0	X	X	0	0	X	0	X	X	0	1	0	1	0	0	0	y
0	1	X	1	X	X	0	0	X	0	X	X	1	1	0	1	0	0	1	y
0	0	1	0	1	0	1	0	0	0	1	1	0	0	0	0	0	0	0	y
0	0	X	1	X	X	1	0	X	0	X	X	1	0	0	0	0	0	1	y
0	0	1	0	1	0	1	0	0	0	1	1	0	1	0	0	0	0	0	y
0	0	X	1	X	X	1	0	X	0	X	X	1	1	0	0	0	0	1	y
0	0	1	0	1	0	0	0	0	0	1	1	0	0	0	0	1	0	0	yl
0	0	X	1	X	X	0	0	X	0	1	1	1	0	0	0	1	0	1	yl
0	1	X	0	X	X	0	0	X	0	1	1	0	1	0	1	1	0	0	yl
0	1	X	1	X	X	0	0	X	0	1	1	1	1	0	1	1	0	1	yl
0	0	1	0	1	0	1	0	0	0	1	1	0	0	0	0	1	0	0	yl
0	0	X	1	X	X	1	0	X	0	1	1	1	0	0	0	1	0	1	yl
0	0	1	0	1	0	1	0	0	0	1	1	0	1	0	0	1	0	0	yl
0	0	X	1	X	X	1	0	X	0	1	1	1	1	0	0	1	0	1	yl

## Sheet: Brg1=1
Brg1	Cyr1	EFG1_T	ESCRT	Efg1	Efg1_active	Farnesol	HAG_T	HATs	HDACs	NRG1_T	Nrg1_HAGs	Rim8	Temperature	Ume6	cAMP_PKA	hyphal_initiation	hyphal_maintenance	pH	type
1	0	1	0	1	0	0	1	0	1	1	0	0	0	1	0	1	1	0	h
1	0	1	1	1	1	0	1	0	1	1	0	1	0	1	0	1	1	1	h
1	1	1	0	1	1	0	1	0	1	1	0	0	1	1	1	1	1	0	h
1	1	1	1	1	1	0	1	0	1	1	0	1	1	1	1	1	1	1	h
1	0	1	0	1	0	1	1	0	1	1	0	0	0	1	0	1	1	0	h
1	0	1	1	1	1	1	1	0	1	1	0	1	0	1	0	1	1	1	h
1	0	1	0	1	0	1	1	0	1	1	0	0	1	1	0	1	1	0	h
1	0	1	1	1	1	1	1	0	1	1	0	1	1	1	0	1	1	1	h
1	0	1	0	1	0	0	1	0	1	0	0	0	0	1	0	0	0	0	hl
1	0	1	1	1	1	0	1	0	1	0	0	1	0	1	0	0	0	1	hl
1	1	1	0	1	1	0	1	0	1	0	0	0	1	1	1	0	0	0	hl
1	1	1	1	1	1	0	1	0	1	0	0	1	1	1	1	0	0	1	hl
1	0	1	0	1	0	1	1	0	1	0	0	0	0	1	0	0	0	0	hl
1	0	1	1	1	1	1	1	0	1	0	0	1	0	1	0	0	0	1	hl
1	0	1	0	1	0	1	1	0	1	0	0	0	1	1	0	0	0	0	hl
1	0	1	1	1	1	1	1	0	1	0	0	1	1	1	0	0	0	1	hl

## Sheet: Efg1=0
Brg1	Cyr1	EFG1_T	ESCRT	Efg1	Efg1_active	Farnesol	HAG_T	HATs	HDACs	NRG1_T	Nrg1_HAGs	Rim8	Temperature	Ume6	cAMP_PKA	hyphal_initiation	hyphal_maintenance	pH	type
1	1	1	0	0	0	0	1	0	1	1	0	0	1	1	1	1	1	0	h
1	0	1	1	0	0	1	1	0	1	1	0	1	1	1	0	1	1	1	h
1	1	1	1	0	0	0	1	0	1	1	0	1	1	1	1	1	1	1	h
1	0	1	0	0	0	1	1	0	1	1	0	0	0	1	0	1	1	0	h
1	0	1	0	0	0	1	1	0	1	1	0	0	1	1	0	1	1	0	h
1	0	1	1	0	0	0	1	0	1	1	0	1	0	1	0	1	1	1	h
1	0	1	0	0	0	0	1	0	1	1	0	0	0	1	0	1	1	0	h
1	0	1	1	0	0	1	1	0	1	1	0	1	0	1	0	1	1	1	h
1	1	1	1	0	0	0	1	0	1	0	0	1	1	1	1	0	0	1	hl
1	0	1	1	0	0	1	1	0	1	0	0	1	1	1	0	0	0	1	hl
1	0	1	0	0	0	1	1	0	1	0	0	0	1	1	0	0	0	0	hl
1	0	1	1	0	0	1	1	0	1	0	0	1	0	1	0	0	0	1	hl
1	0	1	1	0	0	0	1	0	1	0	0	1	0	1	0	0	0	1	hl
1	0	1	0	0	0	1	1	0	1	0	0	0	0	1	0	0	0	0	hl
1	1	1	0	0	0	0	1	0	1	0	0	0	1	1	1	0	0	0	hl
1	0	1	0	0	0	0	1	0	1	0	0	0	0	1	0	0	0	0	hl
0	0	1	1	0	0	0	0	0	0	1	1	1	0	0	0	0	0	1	y
0	0	1	0	0	0	0	0	0	0	1	1	0	0	0	0	0	0	0	y
0	1	1	1	0	0	0	0	0	0	1	1	1	1	0	1	0	0	1	y
0	0	1	0	0	0	1	0	0	0	1	1	0	0	0	0	0	0	0	y
0	0	1	1	0	0	1	0	0	0	1	1	1	0	0	0	0	0	1	y
0	1	1	0	0	0	0	0	0	0	1	1	0	1	0	1	0	0	0	y
0	0	1	0	0	0	1	0	0	0	1	1	0	1	0	0	0	0	0	y
0	0	1	1	0	0	1	0	0	0	1	1	1	1	0	0	0	0	1	y
0	0	1	0	0	0	1	0	0	0	1	1	0	1	0	0	1	0	0	yl
0	0	1	1	0	0	1	0	0	0	1	1	1	0	0	0	1	0	1	yl
0	1	1	1	0	0	0	0	0	0	1	1	1	1	0	1	1	0	1	yl
0	1	1	0	0	0	0	0	0	0	1	1	0	1	0	1	1	0	0	yl
0	0	1	1	0	0	0	0	0	0	1	1	1	0	0	0	1	0	1	yl
0	0	1	0	0	0	0	0	0	0	1	1	0	0	0	0	1	0	0	yl
0	0	1	0	0	0	1	0	0	0	1	1	0	0	0	0	1	0	0	yl
0	0	1	1	0	0	1	0	0	0	1	1	1	1	0	0	1	0	1	yl

## Sheet: Efg1=1
Brg1	Cyr1	EFG1_T	ESCRT	Efg1	Efg1_active	Farnesol	HAG_T	HATs	HDACs	NRG1_T	Nrg1_HAGs	Rim8	Temperature	Ume6	cAMP_PKA	hyphal_initiation	hyphal_maintenance	pH	type
1	0	1	0	1	0	0	1	0	1	1	0	0	0	1	0	1	1	0	h
1	0	1	0	1	0	1	1	0	1	1	0	0	1	1	0	1	1	0	h
1	0	1	1	1	1	1	1	0	1	1	0	1	0	1	0	1	1	1	h
1	0	1	1	1	1	1	1	0	1	1	0	1	1	1	0	1	1	1	h
1	1	1	1	1	1	0	1	0	1	1	0	1	1	1	1	1	1	1	h
1	1	1	0	1	1	0	1	0	1	1	0	0	1	1	1	1	1	0	h
1	0	1	0	1	0	1	1	0	1	1	0	0	0	1	0	1	1	0	h
1	0	1	1	1	1	0	1	0	1	1	0	1	0	1	0	1	1	1	h
1	0	1	1	1	1	1	1	0	1	0	0	1	1	1	0	0	0	1	hl
1	1	1	0	1	1	0	1	0	1	0	0	0	1	1	1	0	0	0	hl
1	0	1	0	1	0	1	1	0	1	0	0	0	1	1	0	0	0	0	hl
1	1	1	1	1	1	0	1	0	1	0	0	1	1	1	1	0	0	1	hl
1	0	1	0	1	0	0	1	0	1	0	0	0	0	1	0	0	0	0	hl
1	0	1	0	1	0	1	1	0	1	0	0	0	0	1	0	0	0	0	hl
1	0	1	1	1	1	1	1	0	1	0	0	1	0	1	0	0	0	1	hl
1	0	1	1	1	1	0	1	0	1	0	0	1	0	1	0	0	0	1	hl
0	0	1	0	1	0	1	0	0	0	1	1	0	1	0	0	0	0	0	y
0	0	1	0	1	0	1	0	0	0	1	1	0	0	0	0	0	0	0	y
0	0	1	0	1	0	0	0	0	0	1	1	0	0	0	0	0	0	0	y
0	0	1	0	1	0	0	0	0	0	1	1	0	0	0	0	1	0	0	yl
0	0	1	0	1	0	1	0	0	0	1	1	0	0	0	0	1	0	0	yl
0	0	0	1	1	1	0	0	1	0	1	1	1	0	0	0	1	0	1	yl
0	0	1	0	1	0	1	0	0	0	1	1	0	1	0	0	1	0	0	yl
0	1	0	1	1	1	0	0	1	0	1	1	1	1	0	1	1	0	1	yl
0	0	0	1	1	1	1	0	1	0	1	1	1	1	0	0	1	0	1	yl
0	0	0	1	1	1	1	0	1	0	1	1	1	0	0	0	1	0	1	yl
0	1	0	0	1	1	0	0	1	0	1	1	0	1	0	1	1	0	0	yl

## Sheet: Efg1_active=0
Brg1	Cyr1	EFG1_T	ESCRT	Efg1	Efg1_active	Farnesol	HAG_T	HATs	HDACs	NRG1_T	Nrg1_HAGs	Rim8	Temperature	Ume6	cAMP_PKA	hyphal_initiation	hyphal_maintenance	pH	type
1	1	1	0	1	0	0	1	0	1	1	0	0	1	1	1	1	1	0	h
1	0	1	1	1	0	1	1	0	1	1	0	1	1	1	0	1	1	1	h
1	1	1	1	1	0	0	1	0	1	1	0	1	1	1	1	1	1	1	h
1	0	1	0	1	0	1	1	0	1	1	0	0	0	1	0	1	1	0	h
1	0	1	0	1	0	1	1	0	1	1	0	0	1	1	0	1	1	0	h
1	0	1	1	1	0	0	1	0	1	1	0	1	0	1	0	1	1	1	h
1	0	1	0	1	0	0	1	0	1	1	0	0	0	1	0	1	1	0	h
1	0	1	1	1	0	1	1	0	1	1	0	1	0	1	0	1	1	1	h
1	1	1	1	1	0	0	1	0	1	0	0	1	1	1	1	0	0	1	hl
1	0	1	1	1	0	1	1	0	1	0	0	1	1	1	0	0	0	1	hl
1	0	1	0	1	0	1	1	0	1	0	0	0	1	1	0	0	0	0	hl
1	0	1	1	1	0	1	1	0	1	0	0	1	0	1	0	0	0	1	hl
1	0	1	1	1	0	0	1	0	1	0	0	1	0	1	0	0	0	1	hl
1	0	1	0	1	0	1	1	0	1	0	0	0	0	1	0	0	0	0	hl
1	1	1	0	1	0	0	1	0	1	0	0	0	1	1	1	0	0	0	hl
1	0	1	0	1	0	0	1	0	1	0	0	0	0	1	0	0	0	0	hl
0	0	1	1	1	0	0	0	0	0	1	1	1	0	0	0	0	0	1	y
0	0	1	0	1	0	0	0	0	0	1	1	0	0	0	0	0	0	0	y
0	1	1	1	1	0	0	0	0	0	1	1	1	1	0	1	0	0	1	y
0	0	1	0	1	0	1	0	0	0	1	1	0	0	0	0	0	0	0	y
0	0	1	1	1	0	1	0	0	0	1	1	1	0	0	0	0	0	1	y
0	1	1	0	1	0	0	0	0	0	1	1	0	1	0	1	0	0	0	y
0	0	1	0	1	0	1	0	0	0	1	1	0	1	0	0	0	0	0	y
0	0	1	1	1	0	1	0	0	0	1	1	1	1	0	0	0	0	1	y
0	0	1	0	1	0	1	0	0	0	1	1	0	1	0	0	1	0	0	yl
0	0	1	1	1	0	1	0	0	0	1	1	1	0	0	0	1	0	1	yl
0	1	1	1	1	0	0	0	0	0	1	1	1	1	0	1	1	0	1	yl
0	1	1	0	1	0	0	0	0	0	1	1	0	1	0	1	1	0	0	yl
0	0	1	1	1	0	0	0	0	0	1	1	1	0	0	0	1	0	1	yl
0	0	1	0	1	0	0	0	0	0	1	1	0	0	0	0	1	0	0	yl
0	0	1	0	1	0	1	0	0	0	1	1	0	0	0	0	1	0	0	yl
0	0	1	1	1	0	1	0	0	0	1	1	1	1	0	0	1	0	1	yl

## Sheet: Efg1_active=1
Brg1	Cyr1	EFG1_T	ESCRT	Efg1	Efg1_active	Farnesol	HAG_T	HATs	HDACs	NRG1_T	Nrg1_HAGs	Rim8	Temperature	Ume6	cAMP_PKA	hyphal_initiation	hyphal_maintenance	pH	type
1	0	1	0	1	1	0	1	0	1	1	0	0	0	1	0	1	1	0	h
1	0	1	0	1	1	1	1	0	1	1	0	0	0	1	0	1	1	0	h
1	0	1	1	1	1	1	1	0	1	1	0	1	1	1	0	1	1	1	h
1	0	1	1	1	1	0	1	0	1	1	0	1	0	1	0	1	1	1	h
1	1	1	1	1	1	0	1	0	1	1	0	1	1	1	1	1	1	1	h
1	1	1	0	1	1	0	1	0	1	1	0	0	1	1	1	1	1	0	h
1	0	1	1	1	1	1	1	0	1	1	0	1	0	1	0	1	1	1	h
1	0	1	0	1	1	1	1	0	1	1	0	0	1	1	0	1	1	0	h
1	0	1	1	1	1	1	1	0	1	0	0	1	1	1	0	0	0	1	hl
1	0	1	0	1	1	1	1	0	1	0	0	0	0	1	0	0	0	0	hl
1	1	1	1	1	1	0	1	0	1	0	0	1	1	1	1	0	0	1	hl
1	1	1	0	1	1	0	1	0	1	0	0	0	1	1	1	0	0	0	hl
1	0	1	1	1	1	0	1	0	1	0	0	1	0	1	0	0	0	1	hl
1	0	1	0	1	1	0	1	0	1	0	0	0	0	1	0	0	0	0	hl
1	0	1	0	1	1	1	1	0	1	0	0	0	1	1	0	0	0	0	hl
1	0	1	1	1	1	1	1	0	1	0	0	1	0	1	0	0	0	1	hl
0	0	0	0	0	1	1	0	1	0	1	1	0	0	0	0	0	0	0	y
0	0	0	0	0	1	0	0	1	0	1	1	0	0	0	0	0	0	0	y
0	0	0	0	0	1	1	0	1	0	1	1	0	1	0	0	0	0	0	y
0	0	0	1	0	1	1	0	1	0	1	1	1	1	0	0	1	0	1	yl
0	0	0	0	0	1	0	0	1	0	1	1	0	0	0	0	1	0	0	yl
0	0	0	1	0	1	1	0	1	0	1	1	1	0	0	0	1	0	1	yl
0	1	0	1	0	1	0	0	1	0	1	1	1	1	0	1	1	0	1	yl
0	1	0	0	0	1	0	0	1	0	1	1	0	1	0	1	1	0	0	yl
0	0	0	1	0	1	0	0	1	0	1	1	1	0	0	0	1	0	1	yl
0	0	0	0	0	1	1	0	1	0	1	1	0	1	0	0	1	0	0	yl
0	0	0	0	0	1	1	0	1	0	1	1	0	0	0	0	1	0	0	yl

## Sheet: EFG1_T=0
Brg1	Cyr1	EFG1_T	ESCRT	Efg1	Efg1_active	Farnesol	HAG_T	HATs	HDACs	NRG1_T	Nrg1_HAGs	Rim8	Temperature	Ume6	cAMP_PKA	hyphal_initiation	hyphal_maintenance	pH	type
1	1	0	0	0	0	0	1	0	1	1	0	0	1	1	1	1	1	0	h
1	0	0	1	0	0	1	1	0	1	1	0	1	1	1	0	1	1	1	h
1	1	0	1	0	0	0	1	0	1	1	0	1	1	1	1	1	1	1	h
1	0	0	0	0	0	1	1	0	1	1	0	0	0	1	0	1	1	0	h
1	0	0	0	0	0	1	1	0	1	1	0	0	1	1	0	1	1	0	h
1	0	0	1	0	0	0	1	0	1	1	0	1	0	1	0	1	1	1	h
1	0	0	0	0	0	0	1	0	1	1	0	0	0	1	0	1	1	0	h
1	0	0	1	0	0	1	1	0	1	1	0	1	0	1	0	1	1	1	h
1	1	0	1	0	0	0	1	0	1	0	0	1	1	1	1	0	0	1	hl
1	0	0	1	0	0	1	1	0	1	0	0	1	1	1	0	0	0	1	hl
1	0	0	0	0	0	1	1	0	1	0	0	0	1	1	0	0	0	0	hl
1	0	0	1	0	0	1	1	0	1	0	0	1	0	1	0	0	0	1	hl
1	0	0	1	0	0	0	1	0	1	0	0	1	0	1	0	0	0	1	hl
1	0	0	0	0	0	1	1	0	1	0	0	0	0	1	0	0	0	0	hl
1	1	0	0	0	0	0	1	0	1	0	0	0	1	1	1	0	0	0	hl
1	0	0	0	0	0	0	1	0	1	0	0	0	0	1	0	0	0	0	hl
0	0	0	1	0	0	0	0	0	0	1	1	1	0	0	0	0	0	1	y
0	0	0	0	0	0	0	0	0	0	1	1	0	0	0	0	0	0	0	y
0	1	0	1	0	0	0	0	0	0	1	1	1	1	0	1	0	0	1	y
0	0	0	0	0	0	1	0	0	0	1	1	0	0	0	0	0	0	0	y
0	0	0	1	0	0	1	0	0	0	1	1	1	0	0	0	0	0	1	y
0	1	0	0	0	0	0	0	0	0	1	1	0	1	0	1	0	0	0	y
0	0	0	0	0	0	1	0	0	0	1	1	0	1	0	0	0	0	0	y
0	0	0	1	0	0	1	0	0	0	1	1	1	1	0	0	0	0	1	y
0	0	0	0	0	0	1	0	0	0	1	1	0	1	0	0	1	0	0	yl
0	0	0	1	0	0	1	0	0	0	1	1	1	0	0	0	1	0	1	yl
0	1	0	1	0	0	0	0	0	0	1	1	1	1	0	1	1	0	1	yl
0	1	0	0	0	0	0	0	0	0	1	1	0	1	0	1	1	0	0	yl
0	0	0	1	0	0	0	0	0	0	1	1	1	0	0	0	1	0	1	yl
0	0	0	0	0	0	0	0	0	0	1	1	0	0	0	0	1	0	0	yl
0	0	0	0	0	0	1	0	0	0	1	1	0	0	0	0	1	0	0	yl
0	0	0	1	0	0	1	0	0	0	1	1	1	1	0	0	1	0	1	yl

## Sheet: EFG1_T=1
Brg1	Cyr1	EFG1_T	ESCRT	Efg1	Efg1_active	Farnesol	HAG_T	HATs	HDACs	NRG1_T	Nrg1_HAGs	Rim8	Temperature	Ume6	cAMP_PKA	hyphal_initiation	hyphal_maintenance	pH	type
1	0	1	0	1	0	0	1	0	1	1	0	0	0	1	0	1	1	0	h
1	0	1	0	1	0	1	1	0	1	1	0	0	1	1	0	1	1	0	h
1	0	1	1	1	1	1	1	0	1	1	0	1	0	1	0	1	1	1	h
1	0	1	1	1	1	1	1	0	1	1	0	1	1	1	0	1	1	1	h
1	1	1	1	1	1	0	1	0	1	1	0	1	1	1	1	1	1	1	h
1	1	1	0	1	1	0	1	0	1	1	0	0	1	1	1	1	1	0	h
1	0	1	0	1	0	1	1	0	1	1	0	0	0	1	0	1	1	0	h
1	0	1	1	1	1	0	1	0	1	1	0	1	0	1	0	1	1	1	h
1	0	1	1	1	1	1	1	0	1	0	0	1	1	1	0	0	0	1	hl
1	1	1	0	1	1	0	1	0	1	0	0	0	1	1	1	0	0	0	hl
1	0	1	0	1	0	1	1	0	1	0	0	0	1	1	0	0	0	0	hl
1	1	1	1	1	1	0	1	0	1	0	0	1	1	1	1	0	0	1	hl
1	0	1	0	1	0	0	1	0	1	0	0	0	0	1	0	0	0	0	hl
1	0	1	0	1	0	1	1	0	1	0	0	0	0	1	0	0	0	0	hl
1	0	1	1	1	1	1	1	0	1	0	0	1	0	1	0	0	0	1	hl
1	0	1	1	1	1	0	1	0	1	0	0	1	0	1	0	0	0	1	hl
0	0	1	0	1	0	1	0	0	0	1	1	0	1	0	0	0	0	0	y
0	0	1	0	1	0	1	0	0	0	1	1	0	0	0	0	0	0	0	y
0	0	1	0	1	0	0	0	0	0	1	1	0	0	0	0	0	0	0	y
0	0	1	0	1	0	0	0	0	0	1	1	0	0	0	0	1	0	0	yl
0	0	1	0	1	0	1	0	0	0	1	1	0	0	0	0	1	0	0	yl
0	0	1	1	1	1	0	0	1	0	1	1	1	0	0	0	1	0	1	yl
0	0	1	0	1	0	1	0	0	0	1	1	0	1	0	0	1	0	0	yl
0	1	1	1	1	1	0	0	1	0	1	1	1	1	0	1	1	0	1	yl
0	0	1	1	1	1	1	0	1	0	1	1	1	1	0	0	1	0	1	yl
0	0	1	1	1	1	1	0	1	0	1	1	1	0	0	0	1	0	1	yl
0	1	1	0	1	1	0	0	1	0	1	1	0	1	0	1	1	0	0	yl

## Sheet: HATs=0
Brg1	Cyr1	EFG1_T	ESCRT	Efg1	Efg1_active	Farnesol	HAG_T	HATs	HDACs	NRG1_T	Nrg1_HAGs	Rim8	Temperature	Ume6	cAMP_PKA	hyphal_initiation	hyphal_maintenance	pH	type
1	0	1	1	1	1	1	1	0	1	1	0	1	1	1	0	1	1	1	h
1	0	1	0	1	0	1	1	0	1	1	0	0	1	1	0	1	1	0	h
1	0	1	1	1	1	1	1	0	1	1	0	1	0	1	0	1	1	1	h
1	0	1	0	1	0	1	1	0	1	1	0	0	0	1	0	1	1	0	h
1	0	1	0	1	0	0	1	0	1	1	0	0	0	1	0	1	1	0	h
1	0	1	1	1	1	0	1	0	1	1	0	1	0	1	0	1	1	1	h
1	1	1	1	1	1	0	1	0	1	1	0	1	1	1	1	1	1	1	h
1	1	1	0	1	1	0	1	0	1	1	0	0	1	1	1	1	1	0	h
1	0	1	1	1	1	1	1	0	1	0	0	1	1	1	0	0	0	1	hl
1	0	1	0	1	0	1	1	0	1	0	0	0	1	1	0	0	0	0	hl
1	0	1	1	1	1	1	1	0	1	0	0	1	0	1	0	0	0	1	hl
1	0	1	0	1	0	0	1	0	1	0	0	0	0	1	0	0	0	0	hl
1	1	1	1	1	1	0	1	0	1	0	0	1	1	1	1	0	0	1	hl
1	1	1	0	1	1	0	1	0	1	0	0	0	1	1	1	0	0	0	hl
1	0	1	1	1	1	0	1	0	1	0	0	1	0	1	0	0	0	1	hl
1	0	1	0	1	0	1	1	0	1	0	0	0	0	1	0	0	0	0	hl
0	0	1	0	1	0	1	0	0	0	1	1	0	0	0	0	0	0	0	y
0	0	1	0	1	0	1	0	0	0	1	1	0	1	0	0	0	0	0	y
0	0	1	0	1	0	0	0	0	0	1	1	0	0	0	0	0	0	0	y
0	1	X	0	X	X	0	0	0	0	1	1	0	1	0	1	1	0	0	yl
0	0	X	1	X	X	1	0	0	0	1	1	1	1	0	0	1	0	1	yl
0	0	X	1	X	X	0	0	0	0	1	1	1	0	0	0	1	0	1	yl
0	0	1	0	1	0	0	0	0	0	1	1	0	0	0	0	1	0	0	yl
0	0	1	0	1	0	1	0	0	0	1	1	0	0	0	0	1	0	0	yl
0	0	X	1	X	X	1	0	0	0	1	1	1	0	0	0	1	0	1	yl
0	0	1	0	1	0	1	0	0	0	1	1	0	1	0	0	1	0	0	yl
0	1	X	1	X	X	0	0	0	0	1	1	1	1	0	1	1	0	1	yl

## Sheet: HATs=1
Brg1	Cyr1	EFG1_T	ESCRT	Efg1	Efg1_active	Farnesol	HAG_T	HATs	HDACs	NRG1_T	Nrg1_HAGs	Rim8	Temperature	Ume6	cAMP_PKA	hyphal_initiation	hyphal_maintenance	pH	type
0	0	1	0	1	0	0	0	1	0	1	1	0	0	0	0	0	0	0	y
0	0	1	0	1	0	1	0	1	0	1	1	0	0	0	0	0	0	0	y
0	0	1	0	1	0	1	0	1	0	1	1	0	1	0	0	0	0	0	y
0	0	1	0	1	0	0	0	1	0	1	1	0	0	0	0	1	0	0	yl
0	0	X	1	X	X	0	0	1	0	1	1	1	0	0	0	1	0	1	yl
0	1	X	0	X	X	0	0	1	0	1	1	0	1	0	1	1	0	0	yl
0	1	X	1	X	X	0	0	1	0	1	1	1	1	0	1	1	0	1	yl
0	0	1	0	1	0	1	0	1	0	1	1	0	0	0	0	1	0	0	yl
0	0	X	1	X	X	1	0	1	0	1	1	1	0	0	0	1	0	1	yl
0	0	1	0	1	0	1	0	1	0	1	1	0	1	0	0	1	0	0	yl
0	0	X	1	X	X	1	0	1	0	1	1	1	1	0	0	1	0	1	yl

[truncated: 8 more sheets: HDACs=0, HDACs=1, Nrg1@HAGs=0, Nrg1@HAGs=1, NRG1_T=0, NRG1_T=1, Ume6=0, Ume6=1]
